# Supplementary material
Source: PubMed Central journal article supplement (PMC2923092)

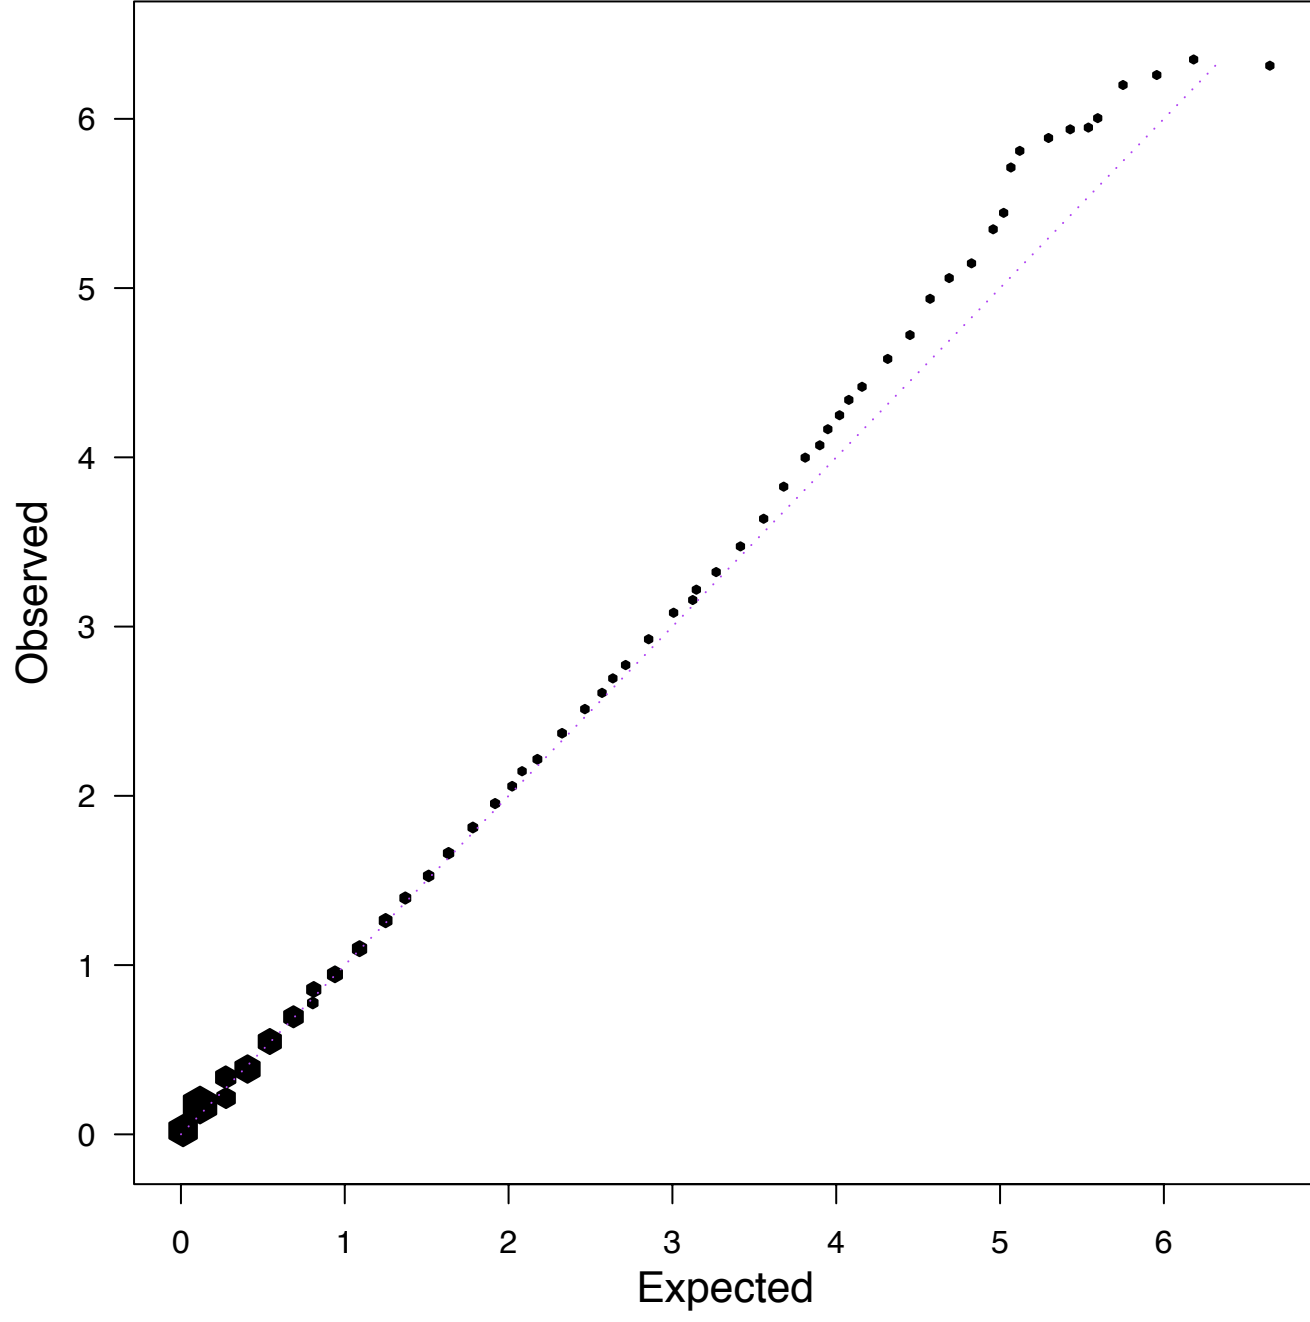

Supplement: NIHMS167015-supplement-Supp1.pdf [file NIHMS167015-supplement-Supp1.pdf]
